# Supplementary material
Source: PubMed Central journal article supplement (PMC4280646)
Supplement: pnas.201413900SI.pdf [file pnas.201413900SI.pdf]

# Supporting Information

Strickland et al. 10.1073/pnas.1413900111

## SI Text

**Error and Uncertainty Analysis.** The uncertainties in measured quantities,  $\delta$ , are

$$\text{transmitted force } \delta_F = \begin{cases} 5 \times 10^{-3} \text{ N} & 1000 \text{ g-F transducer} \\ 5 \times 10^{-4} \text{ N} & 100 \text{ g-F transducer} \\ 5 \times 10^{-5} \text{ N} & 10 \text{ g-F transducer} \end{cases},$$

specimen diameter  $\delta_D = 2 \mu\text{m}$ ,

specimen cross-sectional area  $\delta_{A_o} = \sqrt{(\delta_D)^2 (\pi D)^2}$ ,

specimen length  $\delta_{l_o} = 2 \mu\text{m}$ ,

specimen change in length  $\delta_{\Delta l} = 10 \times 10^{-4} \times l_o$ ,

unfilled capillary mass  $\delta_{m_{\text{unfilled}}} = 2 \mu\text{g}$ ,

filled capillary mass  $\delta_{m_{\text{filled}}} = 2 \mu\text{g}$ ,

micropillar length in capillary  $\delta_L = 10 \mu\text{m}$ .

We assume an uncorrelated propagation of error. The uncertainties in the reported quantities  $\langle \phi \rangle$ ,  $\sigma_{\text{max}}$ , and  $E_{\text{load}}$  are given by

$$\langle \phi \rangle = \frac{(m_{\text{filled}} - m_{\text{empty}}) / \rho_{\text{PS}}}{\pi(D/2)^2 L},$$

$$\delta_{\langle \phi \rangle} = \sqrt{(\delta_{m_{\text{filled}}})^2 \left( \frac{1}{\rho_{\text{PS}} A_o L} \right)^2 + (\delta_{m_{\text{empty}}})^2 \left( \frac{-1}{\rho_{\text{PS}} A_o L} \right)^2 + (\delta_{A_o})^2 \left( \frac{m_{\text{empty}} - m_{\text{filled}}}{\rho_{\text{PS}} A_o^2 L} \right)^2 + (\delta_L)^2 \left( \frac{m_{\text{empty}} - m_{\text{filled}}}{\rho_{\text{PS}} A_o L^2} \right)^2},$$

$$\sigma_{\text{max}} = \frac{F}{A_o},$$

$$\delta_{\sigma_{\text{max}}} = \sqrt{(\delta_{F_{\text{max}}})^2 \left( \frac{1}{A_o} \right)^2 + (\delta_{A_o})^2 \left( \frac{-F_{\text{max}}}{A_o^2} \right)^2},$$

$$E_{\text{load}} \propto \frac{F l_o}{A_o \Delta l},$$

$$\delta_{E_{\text{load}}} = \sqrt{(\delta_F)^2 \left( \frac{l_o}{A_o \Delta l} \right)^2 + (\delta_{l_o})^2 \left( \frac{F}{A_o \Delta l} \right)^2 + (\delta_{A_o})^2 \left( \frac{-F l_o}{A_o^2 \Delta l} \right)^2 + (\delta_{\Delta l})^2 \left( \frac{-F l_o}{A_o \Delta l^2} \right)^2}.$$

For the linear fit of  $\sigma_{\text{max}} = \beta E_{\text{load}}$ , we report the 95% CI for the regression analysis.

**Effects of Dissipation in Stiffness Determination.** Prior work (1) has shown that the micropillars are quite dissipative even at small strains. We define an efficiency,  $\eta$ , which is the ratio of work done by the pillar on loading to the work done on the pillar during loading

$$\eta = \frac{W_{\text{unload}}}{W_{\text{load}}} = \frac{E_{\text{unload}} \epsilon_{\text{elastic}}^2}{E_{\text{load}} \epsilon_{\text{total}}^2},$$

with  $\epsilon_{\text{total}} = \epsilon_{\text{elastic}} + \epsilon_{\text{plastic}}$ . By construction,  $\eta = \frac{\epsilon_{\text{elastic}}}{\epsilon_{\text{total}}}$ , so rearranging yields

$$E_{\text{load}} = \eta E_{\text{unload}}.$$

Assuming  $\eta = 50\%$ , we underestimate the elastic component of stiffness ( $E_{\text{unload}}$ ) by a factor of 2, i.e.,  $2E_{\text{load}} = E_{\text{unload}}$ . Because the transformation strain magnitude,  $\epsilon^*$ , is inversely proportional to  $E$  ( $\gamma_o^T \propto 1/E$ ; Eq. 4), we overestimate the transformation strain by a factor of 2 by using  $E_{\text{load}}$  in the energy analysis. Therefore, our reported value for  $\gamma_o^T$  should be considered an upper bound.

In previous experiments, we quantified the dissipation in a specimen when compressed to small strains as a function of RH. Briefly, we found a strong dependence of  $\eta$  on RH with a significant decrease in  $\eta$ —equivalently, an increase in dissipation—for RH above  $\sim 40\%$ . An example of an experimental compression cycle at  $RH = 50\%$  is shown in Fig. S3.

**Gibbs Free Energy of an Inclusion in an Elastic Matrix.** For completeness, we reproduce the derivation by Mura (2) of the change in the Gibbs free energy,  $G$ , of an inclusion in an elastic matrix with an applied traction. Define

$$\epsilon_{ij} = \frac{1}{2} \left( \frac{\partial u_i}{\partial x_j} + \frac{\partial u_j}{\partial x_i} \right) \equiv \text{total strain},$$

$$\epsilon_{ij}^* \equiv \text{eigenstrain or transformation strain},$$

$$e_{ij} \equiv \text{elastic strain},$$

$$\sigma_{ij} = C_{ijkl} e_{kl} \equiv \text{stress}.$$

The elastic strain energy of a body subjected to an applied traction  $\sigma_{ij}^\infty$  and an internal stress due to an inclusion  $\sigma_{ij}$  is given by

$$W^* = \frac{1}{2} \int_V (\sigma_{ij}^\infty + \sigma_{ij}) (\epsilon_{ij}^\infty + \epsilon_{ij} - \epsilon_{ij}^*) dV \quad \text{with} \quad \sigma_{ij}^\infty = C_{ijkl} \epsilon_{ij}^\infty.$$

Equilibrium ensures that  $\sigma_{ij,j} = 0$  and  $\sigma_{ij} n_j = 0$  at the surface  $S$ . Integration by parts gives

$$\begin{aligned} \int_V \sigma_{ij} (\epsilon_{ij}^\infty + \epsilon_{ij}) dV &= \int_V \sigma_{ij} (u_{i,j}^\infty + u_{i,j}) dV, \\ &= \sigma_{ij} (u_{ij}^\infty + u_{ij}) \Big|_{V=S} - \int_V \sigma_{ij,j} (u_{ij}^\infty + u_{ij}) dV = 0. \end{aligned}$$

Similarly,  $\sigma_{ij,j}^\infty = 0$ . Because  $\epsilon_{ij}^\infty = e_{ij}^\infty$  and  $e_{ij} = \epsilon_{ij} - \epsilon_{ij}^*$  and using the symmetry  $C_{ijkl} = C_{klij}$

$$\begin{aligned} \int_V \sigma_{ij}^{\infty} (\epsilon_{ij} - \epsilon_{ij}^*) dV &= \int_V C_{ijkl} u_{k,l}^{\infty} (u_{i,j} - \epsilon_{ij}^*) dV = \int_V u_{k,l}^{\infty} C_{kl ij} e_{ij} dV, \\ &= \int_V u_{k,l}^{\infty} \sigma_{kl} dV = u_{kl} \sigma_{kl} \Big|_{V=S} - \int_V u_{k,l}^{\infty} \sigma_{k,l} dV = 0. \end{aligned}$$

So

$$W^* = -\frac{1}{2} \int_V \sigma_{ij} \epsilon_{ij}^* dV + \frac{1}{2} \int_V \sigma_{ij}^{\infty} \epsilon_{ij}^{\infty} dV.$$

The total potential energy is given by

$$G = W^* - \int_S F_i^{\infty} (u_i + u_i^{\infty}) dS,$$

where the second term is the work done at the boundary by the applied traction, and  $F_i^{\infty} = \sigma_{ij}^{\infty} n_j$ . Without any inclusions ( $\epsilon_{ij}^* = 0$ ),  $G = G_o$

$$G_o = \frac{1}{2} \int_V \sigma_{ij}^{\infty} \epsilon_{ij}^{\infty} dV - \int_S F_i^{\infty} u_i^{\infty} dS.$$

Without any applied tractions ( $\sigma_{ij}^{\infty} = 0$ ),  $G = G_1$

$$G_1 = -\frac{1}{2} \int_V \sigma_{ij} \epsilon_{ij}^* dV.$$

The interaction between the strain field generated by the inclusions and the applied traction is

$$\begin{aligned} \Delta G &= G - G_o - G_1 = - \int_S \sigma_{ij}^{\infty} u_i n_j dS = - \int_V \sigma_{ij}^{\infty} u_{i,j} dV \\ &= - \int_V \sigma_{ij}^{\infty} (u_{i,j} - \epsilon_{ij}^*) dV - \int_V \sigma_{ij}^{\infty} \epsilon_{ij}^* dV = - \int_V \sigma_{ij}^{\infty} \epsilon_{ij}^* dV. \end{aligned}$$

by Gauss's theorem and the fact that  $\int_V \sigma_{ij}^{\infty} (u_{i,j} - \epsilon_{ij}^*) dV = 0$  (see above). Therefore, with spatially homogeneous stress and strain fields

$$\Delta G = - \int_V \sigma_{ij}^{\infty} \epsilon_{ij}^* dV = - \sigma_{ij}^{\infty} \epsilon_{ij}^*.$$

For the case where the body is under an applied traction and inclusions are introduced, the change in free energy is given by

$$\Delta \bar{G} = G - G_o = \Delta G + G_1 = -\frac{1}{2} \sigma_{ij} \epsilon_{ij}^* - \sigma_{ij}^{\infty} \epsilon_{ij}^*,$$

which is Eq. 1.

**Derivation of the Stress Field for a Prescribed Transformation Strain.** The tensorial infinitesimal strain,  $\epsilon_{ij}$ , is given by

$$\epsilon_{ij} = \frac{1}{2} \left( \frac{\partial u_i}{\partial x_j} + \frac{\partial u_j}{\partial x_i} \right) = \begin{pmatrix} \epsilon_{11} & \epsilon_{12} & \epsilon_{13} \\ \epsilon_{12} & \epsilon_{22} & \epsilon_{23} \\ \epsilon_{13} & \epsilon_{23} & \epsilon_{33} \end{pmatrix} = \begin{pmatrix} \epsilon_{11} & \frac{\gamma_{12}}{2} & \frac{\gamma_{13}}{2} \\ \frac{\gamma_{12}}{2} & \epsilon_{22} & \frac{\gamma_{23}}{2} \\ \frac{\gamma_{13}}{2} & \frac{\gamma_{23}}{2} & \epsilon_{33} \end{pmatrix}.$$

Define the stiffness tensor,  $C_{ijkl}$ , for an isotropic homogeneous solid as

$$C_{ijkl} = \frac{E\nu}{(1+\nu)(1-2\nu)} \delta_{ij} \delta_{kl} + \frac{E}{2(1+\nu)} (\delta_{ik} \delta_{jl} + \delta_{il} \delta_{jk}),$$

and the constitutive relation

$$\sigma_{ij} = C_{ijkl} \epsilon_{kl},$$

where  $\epsilon_{kl}$  is now the elastic component of the strain. Argon and Shi (3) use Eshelby's tensor for a spherical inclusion, given by

$$S_{ijkl} = \frac{5\nu - 1}{15(1-\nu)} \delta_{ij} \delta_{kl} + \frac{4-5\nu}{15(1-\nu)} (\delta_{ik} \delta_{jl} + \delta_{il} \delta_{jk}).$$

To relate the confined strain,  $\epsilon_{ij}^C$ , to the transformation strain,  $\epsilon_{ij}^T$ , of the inclusion

$$\epsilon_{ij}^C = S_{ijkl} \epsilon_{kl}^T.$$

The authors assume two components of  $\epsilon_{kl}^T$

$$\epsilon_{kl}^T = \frac{\epsilon_o^T}{3} \begin{pmatrix} 1 & 0 & 0 \\ 0 & 1 & 0 \\ 0 & 0 & 1 \end{pmatrix} + \frac{\gamma_o^T}{2} \begin{pmatrix} 0 & 1 & 0 \\ 1 & 0 & 0 \\ 0 & 0 & 0 \end{pmatrix},$$

where the first term accounts for dilatation and the second for a pure shear. The stress inside the inclusion,  $\sigma_{ij}^I$ , is given by

$$\sigma_{ij}^I = C_{ijkl} (S_{klmn} \epsilon_{mn}^T - \epsilon_{kl}^T).$$

The elastic energy in both the inclusion and matrix is given as

$$E_{elastic} = -\frac{1}{2} \int_{\Omega_i} \sigma_{ij}^I \epsilon_{ij}^T dV.$$

For the case of a spherical inclusion, in which  $\sigma_{ij}^I$  and  $\epsilon_{ij}^T$  are constants, this expression becomes

$$E_{elastic} = -\frac{1}{2} \sigma_{ij}^I \epsilon_{ij}^T \Omega_i.$$

Considering only the dilatational component of  $\epsilon_{kl}^T$  and using the relationship  $E = 2\mu(1+\nu)$

$$\begin{aligned} \sigma_{ij}^I &= \frac{2E\epsilon_o^T}{9(\nu-1)} \begin{pmatrix} 1 & 0 & 0 \\ 0 & 1 & 0 \\ 0 & 0 & 1 \end{pmatrix} \quad \text{and} \quad E_{elastic} = \frac{E}{9(1-\nu)} (\epsilon_o^T)^2 \\ &= \frac{2\mu(1+\nu)}{9(1-\nu)} (\epsilon_o^T)^2, \end{aligned}$$

which is the same as the second term of equation 7 in ref. 3. Now, considering only the shear component of  $\epsilon_{kl}^T$  yields

$$\begin{aligned} \sigma_{ij}^I &= \frac{E\gamma_o^T(7-5\nu)}{30(\nu^2-1)} \begin{pmatrix} 0 & 1 & 0 \\ 1 & 0 & 0 \\ 0 & 0 & 0 \end{pmatrix} \quad \text{and} \\ E_{elastic} &= \frac{E(7-5\nu)}{60(1-\nu^2)} (\gamma_o^T)^2 = \frac{\mu(7-5\nu)}{30(1-\nu)} (\epsilon_o^T)^2, \end{aligned}$$

which is the same as the first term of equation 7 in ref. 3. In the presence of an applied far-field stress, the change in Gibb's free energy becomes (see previous section)

$$\Delta G = -\frac{1}{2} \sigma_{ij}^I \epsilon_{ij}^T \Omega_f - \sigma_{ij}^\infty \epsilon_{ij} \Omega_f.$$

For uniaxial compression and our assumed orientation of the inclusion, the applied stress is

$$\sigma_{ij} = \frac{\sigma}{2} \begin{pmatrix} -1 & 1 & 0 \\ 1 & -1 & 0 \\ 0 & 0 & 0 \end{pmatrix}.$$

Therefore, the change in free energy is

$$\Delta G = \frac{E}{\nu^2 - 1} \left[ \frac{\nu + 1}{9} (\epsilon_o^T)^2 + \frac{7 - 5\nu}{60} (\gamma_o^T)^2 \right] - \frac{\sigma(2\epsilon_o^T - 3\gamma_o^T)}{6}.$$

Argon and Shi define the transformation dilatancy as

$$\beta = \frac{\epsilon_o^c}{\gamma_o^c} = \frac{45(1 - \nu)^2 \epsilon_o^T}{2(1 + \nu)(4 - 5\nu) \gamma_o^T}.$$

From measurements on an amorphous bubble raft, the authors estimate  $\beta \approx 1$  (3). Therefore

$$\epsilon_o^T = \gamma_o^T \frac{2(1 + \nu)(4 - 5\nu)}{45(1 - \nu)^2},$$

with this relationship

$$\Delta G = \frac{\Omega E}{\nu^2 - 1} \left\{ \frac{\nu + 1}{9} \left[ \frac{2(1 + \nu)(4 - 5\nu)}{45(1 - \nu)^2} \gamma_o^T \right]^2 + \frac{7 - 5\nu}{60} (\gamma_o^T)^2 \right\} + \frac{\Omega \sigma \gamma_o^T}{2} - \frac{\Omega \sigma \gamma_o^T}{3} \frac{2(1 + \nu)(4 - 5\nu)}{45(1 - \nu)^2}.$$

Setting  $\Delta G = 0$  and rearranging yields

$$\frac{\sigma}{E} = \frac{\gamma_o^T [5,675\nu^5 - 33,365\nu^4 + 70,934\nu^3 - 74,578\nu^2 + 39,967\nu - 8,761]}{270(\nu - 1)^3 (155\nu^3 - 111\nu^2 - 147\nu + 119)} \equiv \gamma_o^T \theta(\nu).$$

1. Strickland DJ, et al. (2014) Synthesis and mechanical response of disordered colloidal micropillars. *Phys Chem Chem Phys* 16(22):10274–10285.
2. Mura T (1987) *Micromechanics of Defects in Solids* (Springer, Berlin), Vol 3.

3. Argon AS, Shi L (1983) Development of visco-plastic deformation in metallic glasses. *Acta Metall* 31(4):499–507.

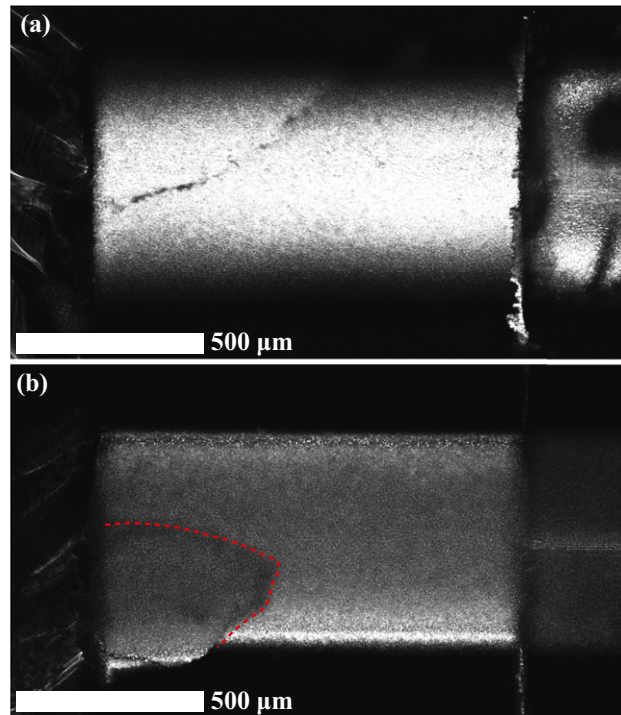

**Fig. S1.** Laser-scanning confocal micrographs of deformed micropillar specimens. (A) A specimen with  $\phi = 0.559$  compressed at  $RH = 60\%$ . Failure results from the development of a shear band that propagates from the specimen/punch interface to the specimen surface. (B) A specimen with  $\phi = 0.687$  compressed at  $RH = 50\%$ . The darker region outlined by the dashed red line has been sheared out of plane.
